# Supplementary material
Source: PubMed Central journal article supplement (PMC1860653)
Supplement: heart_92_6_855__1.pdf [file heart_92_6_855__1.pdf]

## Genetics of heart attack (ht60202)

### E Topol

#### Web only refs

1. Wade N. Genetic Code of Human Life is Cracked by Scientists. *The New York Times*, June 27, 2000:A1.
2. The International HapMap Consortium. The International HapMap Project. *Nature* 2003;**426**:789–96.
3. Patino WD, Mian OY, Kang J-G, *et al.* Circulation transcriptome reveals markers of atherosclerosis. *Proc Natl Acad Sci USA* 2005;**102**:3423–28.
4. You S-A, Archacki SR, Angheloiu G, *et al.* Proteomic approach to coronary atherosclerosis indicates ferritin light chain as a significant marker: Evidence to support the iron hypothesis in atherosclerotic disease. *Physiological Genomics* 2003;**13**:25–30.
5. Brindle JT, Antti H, Holmes E, *et al.* Rapid and noninvasive diagnosis of the presence and severity of coronary artery disease using <sup>1</sup>H-NMR-based metabolomics. *Nature Medicine* 2002;**8**:1439–1444.
6. Stenina OI, Desai S, Kight K, *et al.* Thrombospondin-4 and its variants: Expression and differential effects on endothelial cells. *Circulation* 2003;**108**:1514–19.
7. Pluskota E, Stenina OI, Krukovets I, *et al.* The mechanisms and impact of TSP-4 polymorphisms on neutrophil function. *Blood* Aug 11, 2005, (EPub ahead of print).
8. Pajukanta P, Cargill M, Viitanen L, *et al.* Two loci on chromosomes 2 and X for premature coronary heart disease identified in early- and late-settlement populations of Finland. *American Journal of Human Genetics* 2000;**67**:1481–93.
9. Hauser ER, Crossman DC, Granger CB, *et al.* A genomewide scan for early-onset coronary artery disease in 438 families: The GENECARD Study. *American Journal of Human Genetics* 2004;**75**:436–47.
10. Francke S, Manraj M, Lacquemant C, *et al.* A genome-wide scan for coronary heart disease suggests in Indo-Mauritians a susceptibility locus on chromosome 16p13 and replicates linkage with the metabolic syndrome on 3q27. *Human Molecular Genetics* 2001;**10**:2751–65.
11. Broeckel U, Hengstenberg C, Mayer B, *et al.* A comprehensive linkage analysis for myocardial infarction and its related risk factors. *Nature Genetics* 2002;**30**:210–4.
12. Harrap SB, Zammit KS, Wong ZY, *et al.* Genome-wide linkage analysis of the acute coronary syndrome suggests a locus on chromosome 2. *Arteriosclerosis Thrombosis and Vascular Biology* 2002;**22**:874–8.
13. Garg V, Muth AN, Ransom JF, *et al.* Mutations in *NOTCH1* cause aortic valve disease. *Nature* 2005;**437**:270–4.
14. Hageman GS, Anderson DH, Johnson LV, *et al.* A common haplotype in the complement regulatory gene factor H (HF1/CHF) predisposes individuals to age-related macular degeneration. *Proc Natl Acad Sci USA* 2005;**102**:7227–7232.
15. Haines JL, Hauser MA, Schmidt S, *et al.* Complement factor H variant increases the risk of age-related macular degeneration. *Science* 2005;**308**:419–421.
16. Edwards AO, Riter R 3<sup>rd</sup>, Abel KJ, *et al.* Complement factor H polymorphism and age-related macular degeneration. *Science* 2005;**308**:421–424.

17. Klein RJ, Zeiss C, Chew EY, *et al.* Complement factor H polymorphism in age-related macular degeneration. *Science* 2005;**308**:385–389.
18. Zarepari S, Branham KEH, Li M, *et al.* Strong association of the Y402H variant in complement factor H at 1q32 with susceptibility to age-related macular degeneration. *Am J Hum Genet* 2005;**77**:149–153.
19. Swanberg M, Lidman O, Padyukov L, *et al.* MHC2TA is associated with differential MHC molecule expression and susceptibility to rheumatoid arthritis, multiple sclerosis and myocardial infarction. *Nature Genetics* 2005;**37**:486–494.
20. Wang X, Ria M, Kelmenson PM, *et al.* Positional identification of TNFSF4, encoding OX40 ligand, as a gene that influences atherosclerosis susceptibility. *Nature Genetics* 2005;**37**:365–372.
21. Mehrabian M, Allayee H, Wong J, *et al.* Identification of 5-lipoxygenase as a major gene contributing to atherosclerosis susceptibility in mice. *Circulation Research* 2002;**91**:120–26.
22. Helgadottir A, Gretarsdottir S, St. Clair D, *et al.* Association between the gene encoding 5-lipoxygenase-activating protein and stroke replicated in a Scottish population. *American Journal of Human Genetics* 2005;**76**:505–509.
23. Yamada A, Ichihara S, Murase Y, *et al.* Lack of association of polymorphisms of the lymphotoxin alpha gene with myocardial infarction in Japanese. *Journal of Molecular Medicine* 2004;**82**:477–83.
